# Supplementary material
Source: Elsevier journal article supplement (https://www.sciencedirect.com/science/article/pii/S0870255117307059)
Supplement: mmc1 [file S0870255117307059:mmc1.docx]

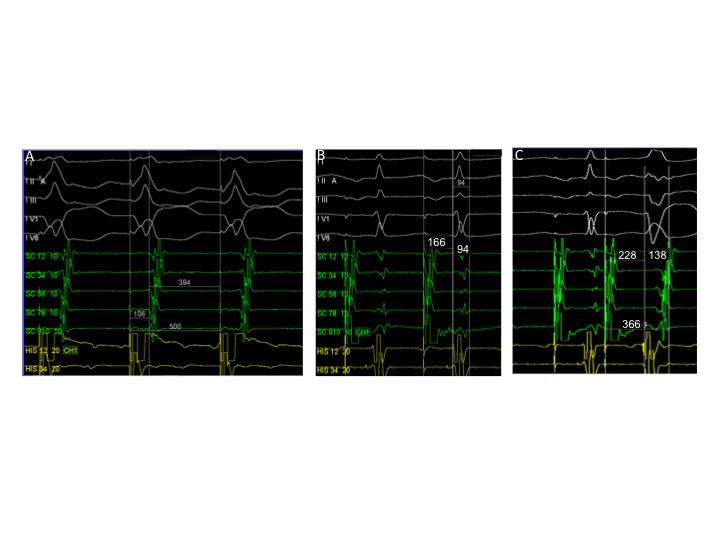


**Figura Suplementar 1. Estudo eletrofisiológico: (A)** *Pacing* ventricular continuo a demonstrar condução VA concêntrica; **(B,C)** *Pacing* auricular programado a 500/400 ms e 500/290 ms, respetivamente, com alargamento progressivo do intervalo AV (aumento de intervalo AH, redução de HV) e alargamento progressivo do QRS (evidência de pré-excitação ventricular por VA com propriedades decrementais). ms: milisegundos


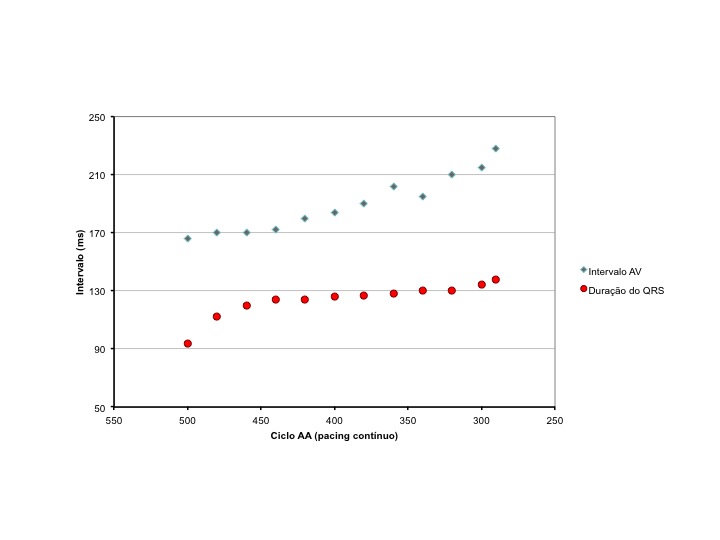


**Figura Suplementar 2.** Alargamento progressivo do QRS e do intervalo AV sob *pacing* auricular incremental (evidência de pré-excitação ventricular por VA com propriedades decrementais).


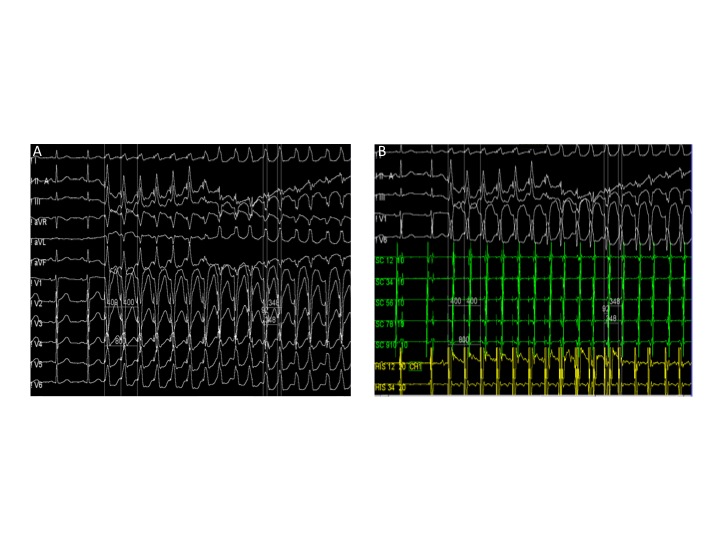


**Figura Suplementar 3. Estudo eletrofisiológico: (A) ECG de superfície** com Indução de TRAV antidrómica com morfologia de BRE sob *pacing* auricular continuo; **(B) Eletrogramas intracavitários** com indução de TRAV antidrómica com morfologia de BRE com *pacing* auricular continuo. BREt: Bloqueio de ramo esquerdo típico; TRAV: taquicardia de reentrada auriculoventricular.


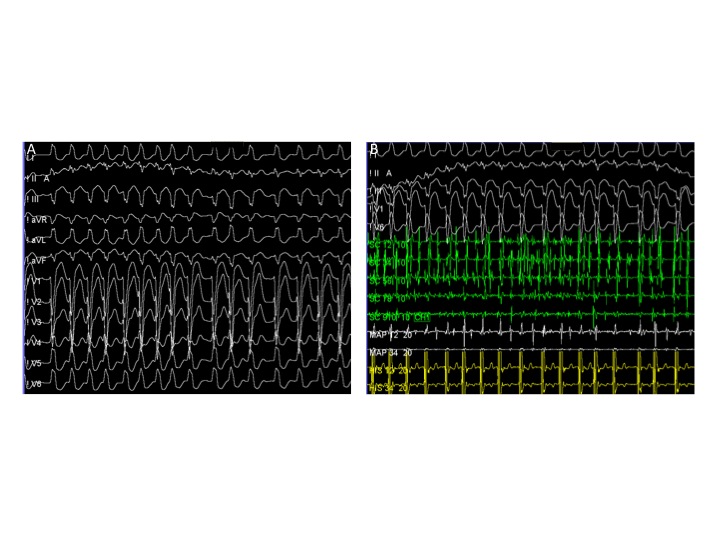


**Figura Suplementar 4. Estudo eletrofisiológico: (A) ECG de superfície** com progressão de TRAV para para fibrilhação auricular pré-excitada; **(B) Eletrogramas intracavitários** com progressão de TRAV para para fibrilhação auricular pré-excitada. TRAV: taquicardia de reentrada auriculoventricular.
